# Supplementary material for: The Unusual Architecture of RNA-Dependent RNA Polymerase (RdRp)’s Catalytic Chamber Provides a Potential Strategy for Combination Therapy against COVID-19
Source: MDPI journal article supplement (doi:10.3390/molecules28062806), 2023-03-20
Supplement: s1 [file s1]

## Supplementary Information

### **The Unusual Architecture of RNA-Dependent RNA Polymerase (RdRp)'s Catalytic Chamber Provides a Potential Strategy for Combination Therapy against COVID-19**

Kamel Metwally<sup>1,2\*</sup>, Nader E. Abo-Dya<sup>1,3</sup>, Mohamed Issa Alahmdi<sup>4</sup>, Maha Z. Albalawi<sup>5</sup>, Galal Yahya<sup>6</sup>, Aimen Aljoundi<sup>7</sup>, Elliasu Y. Salifu<sup>7</sup>, Ghazi Elamin<sup>7</sup>, Mahmoud Ibrahim<sup>7,8</sup>, Yasien Sayed<sup>9</sup>, Sylvia Fanucchi<sup>9</sup> and Mahmoud E.S Soliman<sup>7\*</sup>

<sup>1</sup>Department of Pharmaceutical Chemistry, Faculty of Pharmacy, University of Tabuk, Tabuk 71491, Saudi Arabia

<sup>2</sup>Department of Pharmaceutical Medicinal Chemistry, Faculty of Pharmacy, Zagazig University, Zagazig 44519, Egypt

<sup>3</sup>Department of Pharmaceutical Organic Chemistry, Faculty of Pharmacy, Zagazig University, Zagazig 44519, Egypt

<sup>4</sup>Department of Chemistry, Faculty of Science, University of Tabuk, Tabuk 71491, Saudi Arabia

<sup>5</sup>Pharm D Program, Faculty of Pharmacy, University of Tabuk, Tabuk 71491, Saudi Arabia

<sup>6</sup>Department of Microbiology and Immunology, Faculty of Pharmacy, Zagazig University, Zagazig 44519, Egypt

<sup>7</sup>Molecular Bio-computation and Drug Design Laboratory, School of Health Sciences, University of KwaZulu-Natal, Westville Campus, Durban 4001, South Africa

<sup>8</sup>CompChem Lab, Chemistry Department, Faculty of Science, Minia University, Minia 61519, Egypt.

<sup>9</sup>Protein Structure-Function Research Unit, School of Molecular and Cell Biology, University of the Witwatersrand, Johannesburg, 2050, South Africa

\*Corresponding Author: Kamel Metwally, Email: [kametwally@ut.edu.sa](mailto:kametwally@ut.edu.sa)

& Mahmoud E.S. Soliman, Email: [soliman@ukzn.ac.za](mailto:soliman@ukzn.ac.za)

Website: <http://soliman.ukzn.ac.za>

Telephone: +27 (0) 31 260 8048, Fax: +27 (0) 31 260 78

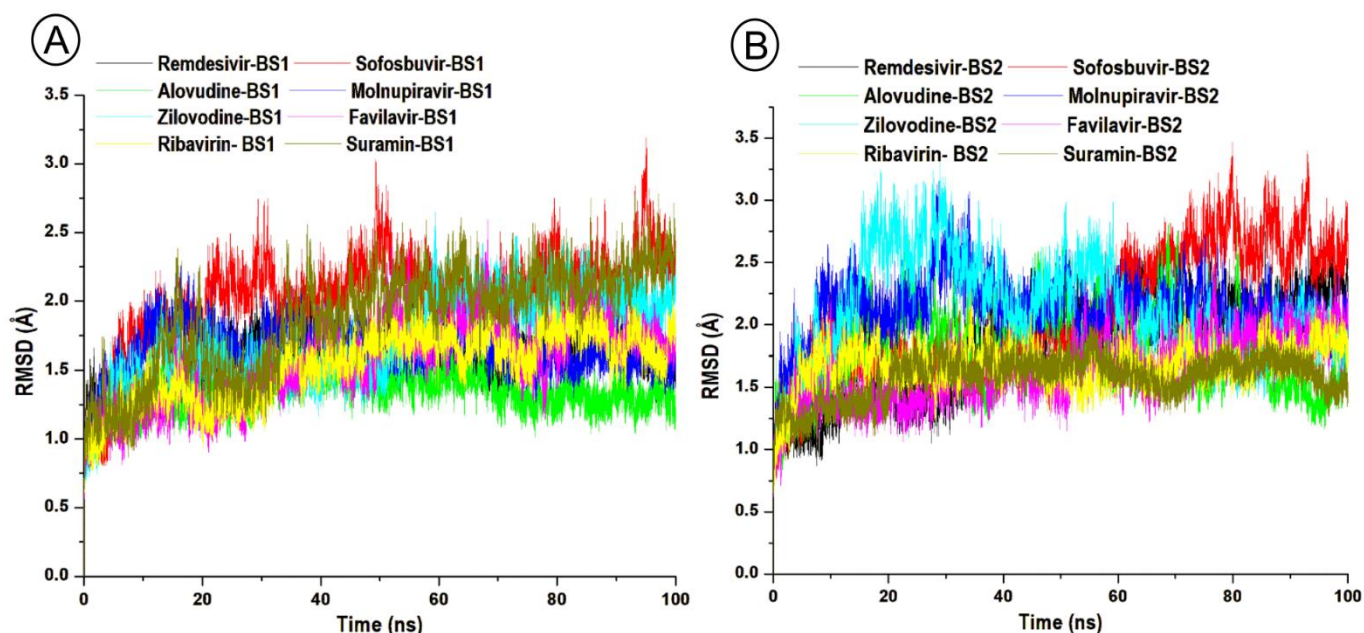

**Figure S1:** Structural representation of alterations occurring during the binding of the selected eight antiviral to RdRp Catalytic Chamber BS1 and BS2. (A) The conformational stability, C- $\alpha$  atoms RMSD of the eight antiviral to RdRp Catalytic Chamber BS1 with the different colors showed. (B) Conformational stability, C- $\alpha$  atoms RMSD of the eight antiviral inhibitors to RdRp Catalytic Chamber BS2 ran for 100 ns MD simulation.

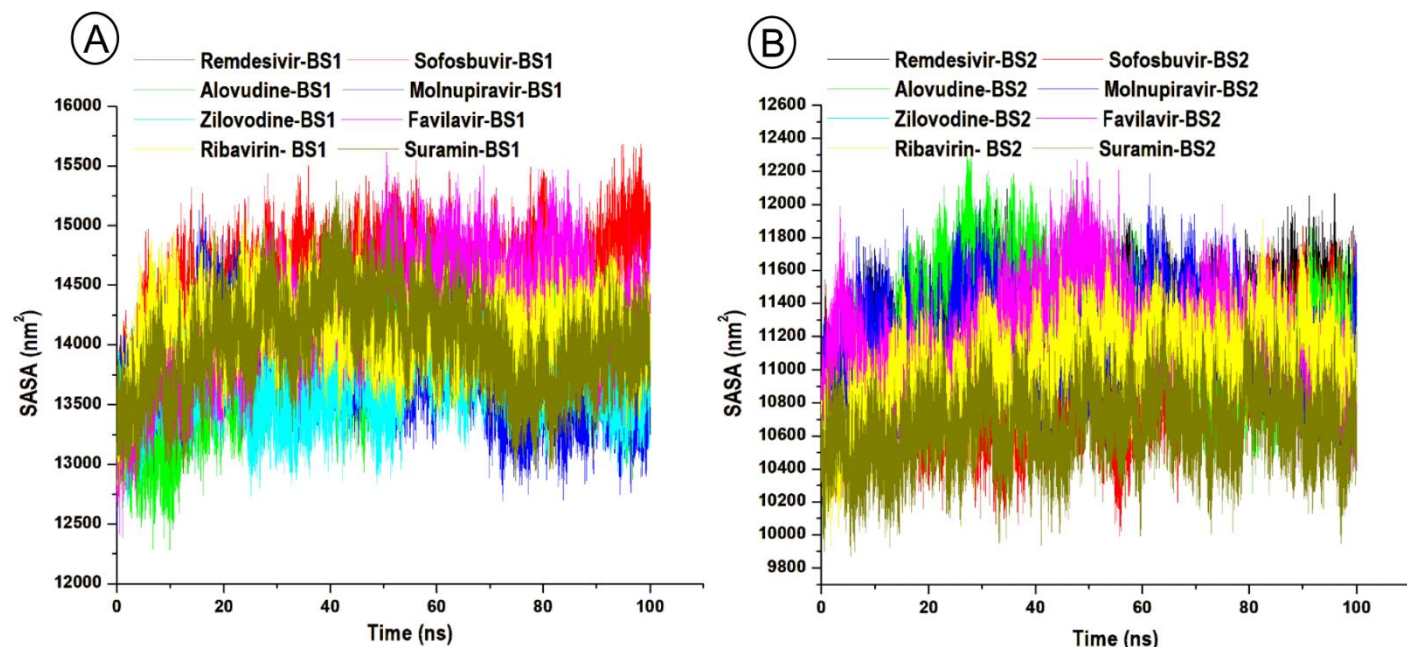

**Figure S2:** Structural representation of alterations occurring during the binding of the selected eight antiviral to RdRp Catalytic Chamber BS1 and BS2. The (A) Solvent accessible surface area (SASA) for the antiviral inhibitors at BS1. (B) Solvent accessible surface area (SASA) for the antiviral inhibitors at BS2 Catalytic Chamber.

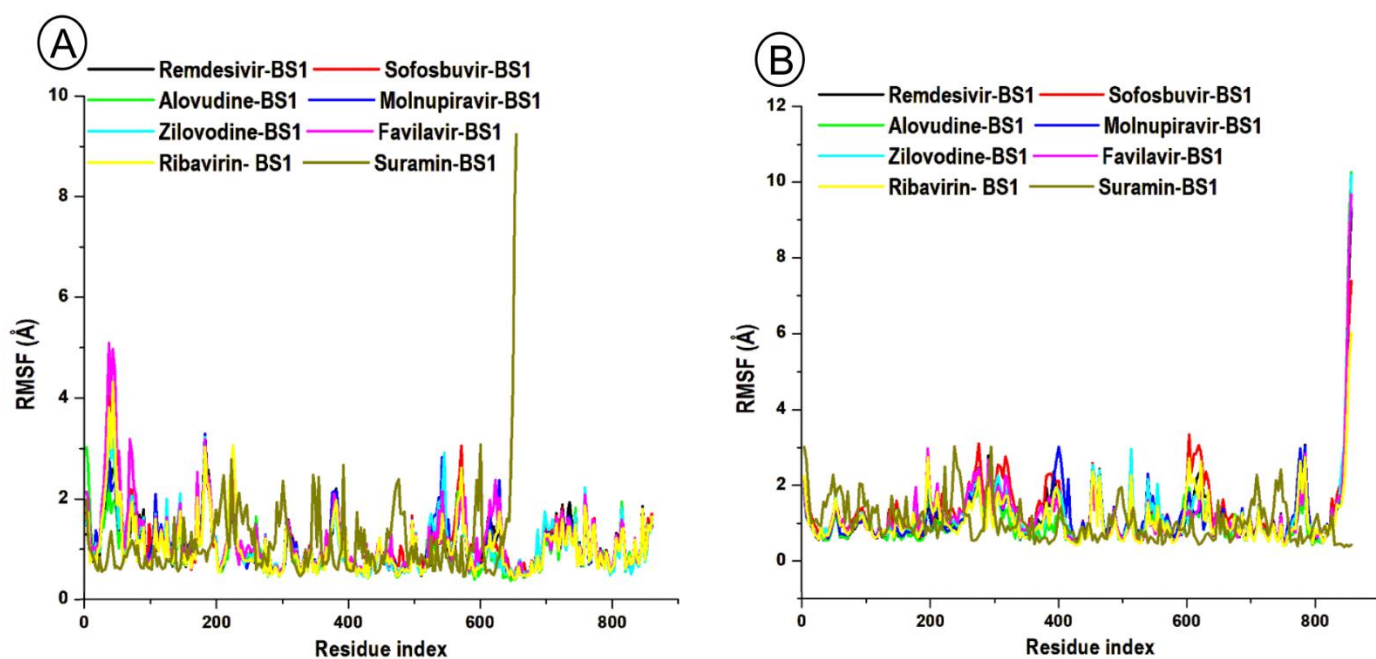

**Figure S3:** The time evolution RMSF of each residue of the enzyme C- $\alpha$  atom over 100 ns for (A) the selected eight antiviral inhibitors bind to RdRp Catalytic Chamber BS1, (B) the selected antiviral inhibitors bind to RdRp Catalytic Chamber BS2 respectively.
